# Supplementary material
Source: PubMed Central journal article supplement (PMC10025976)
Supplement: NIHMS1874077-supplement-supplement.pdf [file NIHMS1874077-supplement-supplement.pdf]

## White matter alterations and the conversion to psychosis: a combined diffusion tensor imaging and glutamate <sup>1</sup>H MRS study

Pablo León-Ortiz, Francisco Reyes-Madrigo, Peter Kochunov, Gladys Gómez-Cruz, Tomás Moncada-Habib, Melanie Malacara, Ricardo Mora-Durán, Laura M. Rowland, Camilo de la Fuente-Sandoval

*Schizophrenia Research*

### Supplementary Material

**Supplementary Table 1.** Fractional anisotropy in clinical high-risk individuals that transitioned to psychosis, individuals that did not transition and healthy controls.

| Region of Interest                | Mean FA ( $\pm$ SD) |              |              | Statistics                     |
|-----------------------------------|---------------------|--------------|--------------|--------------------------------|
|                                   | CHR-T               | CHR-N        | Controls     |                                |
| Whole-brain FA Average            | 0.48 (0.024)        | 0.48 (0.013) | 0.48 (0.011) | $F_{[2, 67]} = 0.39, p = 0.68$ |
| Genu of Corpus Callosum           | 0.72 (0.022)        | 0.72 (0.023) | 0.71 (0.025) | $F_{[2, 67]} = 1.48, p = 0.23$ |
| Body of Corpus Callosum           | 0.67 (0.045)        | 0.68 (0.031) | 0.68 (0.030) | $F_{[2, 67]} = 0.36, p = 0.70$ |
| Splenium of Corpus Callosum       | 0.77 (0.022)        | 0.78 (0.019) | 0.78 (0.024) | $F_{[2, 67]} = 0.33, p = 0.72$ |
| Corpus Callosum                   | 0.72 (0.022)        | 0.73 (0.018) | 0.72 (0.019) | $F_{[2, 67]} = 0.68, p = 0.51$ |
| Corona Radiata                    | 0.52 (0.036)        | 0.51 (0.015) | 0.52 (0.017) | $F_{[2, 67]} = 0.28, p = 0.78$ |
| Fornix                            | 0.49 (0.056)        | 0.49 (0.035) | 0.49 (0.031) | $F_{[2, 67]} = 0.33, p = 0.72$ |
| Corticospinal Tract               | 0.63 (0.050)        | 0.61 (0.030) | 0.61 (0.027) | $F_{[2, 67]} = 1.03, p = 0.36$ |
| Anterior Limb of Internal Capsule | 0.59 (0.024)        | 0.60 (0.026) | 0.60 (0.026) | $F_{[2, 67]} = 0.57, p = 0.57$ |

|                                       |              |              |              |                                                                  |
|---------------------------------------|--------------|--------------|--------------|------------------------------------------------------------------|
| Internal Capsule                      | 0.64 (0.026) | 0.64 (0.017) | 0.64 (0.021) | $F_{[2, 67]} = 0.07, p = 0.93$                                   |
| Posterior Limb of Internal Capsule    | 0.71 (0.039) | 0.71 (0.021) | 0.70 (0.024) | $F_{[2, 67]} = 0.90, p = 0.41$                                   |
| Retrolicular part of Internal Capsule | 0.62 (0.032) | 0.61 (0.023) | 0.61 (0.023) | $F_{[2, 67]} = .57, p = 0.57$                                    |
| Anterior Corona Radiata               | 0.50 (0.046) | 0.49 (0.024) | 0.50 (0.023) | $F_{[2, 67]} = 0.63, p = 0.53$                                   |
| Superior Corona Radiata               | 0.53 (0.043) | 0.52 (0.020) | 0.52 (0.022) | $F_{[2, 67]} = 0.17, p = 0.84$                                   |
| Posterior Corona Radiata              | 0.52 (0.027) | 0.53 (0.020) | 0.53 (0.020) | $F_{[2, 67]} = 1.29, p = 0.28$                                   |
| Posterior Thalamic Radiation          | 0.61 (0.029) | 0.64 (0.021) | 0.63 (0.025) | <b><math>F_{[2, 67]} = 3.44, p = 0.04</math></b> <sup>a, b</sup> |
| Sagittal Stratum                      | 0.56 (0.021) | 0.57 (0.030) | 0.57 (0.022) | $F_{[2, 67]} = 0.29, p = 0.75$                                   |
| External Capsule                      | 0.50 (0.020) | 0.51 (0.017) | 0.51 (0.018) | $F_{[2, 67]} = 1.11, p = 0.34$                                   |
| Cingulum                              | 0.62 (0.030) | 0.63 (0.024) | 0.64 (0.038) | $F_{[2, 67]} = 2.27, p = 0.11$                                   |
| Cingulum (Hippocampal portion)        | 0.53 (0.051) | 0.53 (0.036) | 0.55 (0.043) | $F_{[2, 67]} = 1.93, p = 0.15$                                   |
| Fornix Stria Terminalis               | 0.57 (0.046) | 0.57 (0.027) | 0.57 (0.036) | $F_{[2, 67]} = 0.20, p = 0.81$                                   |
| Superior Longitudinal Fasciculus      | 0.53 (0.019) | 0.53 (0.020) | 0.57 (0.034) | $F_{[2, 67]} = 0.97, p = 0.38$                                   |
| Superior Fronto-Occipital Fasciculus  | 0.55 (0.032) | 0.55 (0.036) | 0.55 (0.038) | $F_{[2, 67]} = 0.01, p = 0.99$                                   |
| Inferior Fronto-Occipital Fasciculus  | 0.51 (0.058) | 0.53 (0.036) | 0.53 (0.036) | $F_{[2, 67]} = 1.47, p = 0.24$                                   |
| Uncinate                              | 0.60 (0.041) | 0.59 (0.048) | 0.60 (0.037) | $F_{[2, 67]} = 0.15, p = 0.86$                                   |

---

Significant post hoc pair-wise comparisons with Bonferroni correction ( $p < 0.05$ ) are indicated: <sup>a</sup> CHR-T < CHR-N, <sup>b</sup> CHR-T < Healthy controls. CHR-T, Clinical high risk that transitioned to psychosis; CHR-N, Clinical high risk that did not transition to psychosis; FA, Fractional anisotropy.

**Supplementary Table 2.** Relationships between fractional anisotropy values and glutamate levels in clinical high-risk individuals that transitioned to psychosis, individuals that did not transition and healthy controls.

| Region of Interest                    | Glutamate levels    |              |              |
|---------------------------------------|---------------------|--------------|--------------|
|                                       | Pearson r (p Value) |              |              |
|                                       | CHR-T               | CHR-N        | Controls     |
| Whole-brain FA Average                | 0.51 (0.30)         | 0.26 (0.19)  | 0.17 (0.31)  |
| Genu of Corpus Callosum               | 0.28 (0.59)         | 0.27 (0.18)  | 0.25 (0.13)  |
| Body of Corpus Callosum               | -0.79 (0.06)        | -0.17 (0.42) | 0.24 (0.14)  |
| Splenium of Corpus Callosum           | -0.09 (0.86)        | -0.05 (0.82) | 0.09 (0.59)  |
| Corpus Callosum                       | -0.53 (0.28)        | -0.12 (0.58) | 0.28 (0.09)  |
| Corona Radiata                        | 0.79 (0.06)         | 0.01 (0.98)  | 0.04 (0.82)  |
| Fornix                                | -0.53 (0.28)        | 0.04 (0.85)  | 0.08 (0.65)  |
| Corticospinal Tract                   | -0.22 (0.67)        | -0.01 (0.98) | 0.25 (0.13)  |
| Anterior Limb of Internal Capsule     | 0.10 (0.84)         | -0.09 (0.67) | 0.09 (0.61)  |
| Internal Capsule                      | 0.58 (0.23)         | -0.04 (0.88) | 0.09 (0.59)  |
| Posterior Limb of Internal Capsule    | 0.36 (0.48)         | 0.14 (0.49)  | 0.17 (0.31)  |
| Retrolicular part of Internal Capsule | <b>0.89 (0.02)</b>  | -0.09 (0.66) | -0.02 (0.89) |
| Anterior Corona Radiata               | 0.58 (0.22)         | -0.05 (0.83) | -0.01 (0.99) |
| Superior Corona Radiata               | 0.81 (0.05)         | 0.01 (0.99)  | 0.09 (0.61)  |
| Posterior Corona Radiata              | 0.79 (0.06)         | 0.06 (0.77)  | 0.01 (0.98)  |

|                                      |                     |              |              |
|--------------------------------------|---------------------|--------------|--------------|
| Posterior Thalamic Radiation         | <b>0.88 (0.02)</b>  | 0.02 (0.94)  | 0.09 (0.63)  |
| Sagittal Stratum                     | 0.75 (0.08)         | -0.07 (0.74) | -0.06 (0.72) |
| External Capsule                     | 0.01 (0.99)         | -0.04 (0.85) | -0.13 (0.44) |
| Cingulum                             | <b>-0.83 (0.04)</b> | -0.29 (0.15) | 0.02 (0.90)  |
| Cingulum (Hippocampal portion)       | 0.05 (0.92)         | 0.05 (0.82)  | 0.14 (0.41)  |
| Fornix Stria Terminalis              | -0.44 (0.39)        | -0.11 (0.59) | 0.13 (0.45)  |
| Superior Longitudinal Fasciculus     | 0.71 (0.11)         | -0.07 (0.79) | 0.13 (0.44)  |
| Superior Fronto-Occipital Fasciculus | 0.32 (0.53)         | -0.31 (0.14) | 0.04 (0.83)  |
| Inferior Fronto-Occipital Fasciculus | 0.03 (0.95)         | 0.06 (0.78)  | -0.01 (0.97) |
| Uncinate                             | 0.68 (0.14)         | -0.09 (0.67) | 0.27 (0.10)  |

---

Significant correlations ( $p < 0.05$ ) are indicated. CHR-T, Clinical high risk that transitioned to psychosis; CHR-N, Clinical high risk that did not transition to psychosis; FA, Fractional anisotropy.

**Supplementary Table 3.** Voxel tissue composition and spectral quality values in clinical high risk individuals that did not transition, individuals that transitioned to psychosis and healthy controls.

| Measure                            | Mean ( $\pm$ SD) |              |              | Statistic                      |
|------------------------------------|------------------|--------------|--------------|--------------------------------|
|                                    | Healthy Controls | CHR- N       | CHR-T        |                                |
| Glutamate levels (I.U.)            | 8.29 (0.79)      | 8.38 (0.93)  | 8.27 (1.16)  | $F_{[2, 66]} = 0.10, p = 0.91$ |
| Voxel grey matter fraction         | 0.17 (0.05)      | 0.18 (0.06)  | 0.20 (0.11)  | $F_{[2, 66]} = 0.44 p = 0.65$  |
| Voxel white matter fraction        | 0.81 (0.05)      | 0.81 (0.06)  | 0.80 (0.11)  | $F_{[2, 66]} = 0.31 p = 0.73$  |
| Voxel cerebrospinal fluid fraction | 0.01 (0.01)      | 0.01 (0.01)  | 0.01 (0.01)  | $F_{[2, 66]} = 0.95 p = 0.39$  |
| Signal-to-noise ratio              | 16.32 (2.29)     | 17.19 (3.06) | 15.67 (3.33) | $F_{[2, 66]} = 1.19 p = 0.31$  |
| FWHM                               | 0.057 (0.01)     | 0.057 (0.01) | 0.058 (0.02) | $F_{[2, 66]} = 0.05 p = 0.95$  |

CHR-N, Clinical high risk that did not transition to psychosis; CHR-T, Clinical high risk that transitioned to psychosis; I.U., Institutional units; FWHM, Full-width at half maximum.
